# Supplementary material for: Sustainable antimicrobial packaging films: effectiveness of epsilon-poly- l -lysine in PLA/PBAT blend films
Source: Royal Society of Chemistry journal article supplement (doi:10.1039/d5fb00286a), 2025-01-01
Supplement: d5fb00286a1.pdf [file d5fb00286a1.pdf]

### Supplementary data

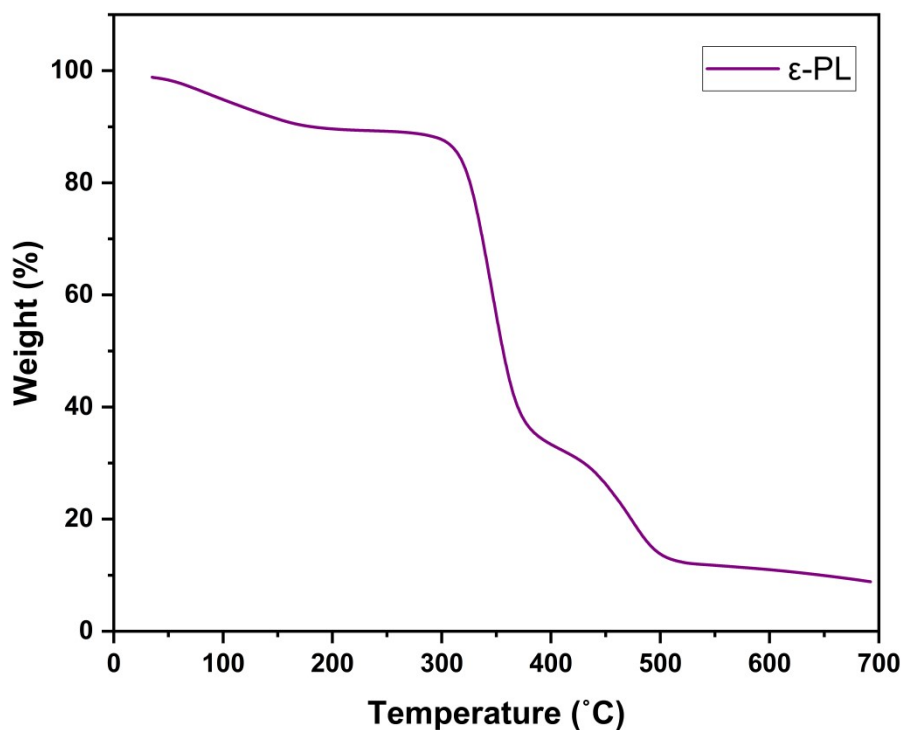

Fig.S1 Thermogravimetric analysis (TGA) curve of ε-PL. The TGA curve represents the thermal stability of ε-PL, indicating initial weight loss due to the evaporation of moisture followed by major degradation starting at around 300 °C.

Table.S1 Correlation coefficients ( $R^2$ ) of Higuchi, first-order, and zero-order kinetic models applied to the release of ε-PL from PLA/PBAT blend films with different ε-PL contents (1–5 wt %).

| Sample                     | Zero order<br>( $R^2$ value) | First order<br>( $R^2$ value) | Higuchi model<br>( $R^2$ value) |
|----------------------------|------------------------------|-------------------------------|---------------------------------|
| PLA/PBAT blend + 1wt% ε-PL | 0.95                         | 0.93                          | 0.98                            |
| PLA/PBAT blend + 2wt% ε-PL | 0.91                         | 0.93                          | 0.96                            |
| PLA/PBAT blend + 3wt% ε-PL | 0.88                         | 0.84                          | 0.96                            |
| PLA/PBAT blend + 4wt% ε-PL | 0.96                         | 0.89                          | 0.97                            |
| PLA/PBAT blend + 5wt% ε-PL | 0.93                         | 0.91                          | 0.96                            |
